# Supplementary material for: Risk Prediction Score for HIV Infection: Development and Internal Validation with Cross-Sectional Data from Men Who Have Sex with Men in China
Source: Springer Nature journal article supplement (doi:10.1007/s10461-018-2129-y), 2018-05-21
Supplement: MOESM2 [file 15778688]

**Appendix S2. Candidate predictors**

| **Item No.** | **Variables** | **Variable type** |
| --- | --- | --- |
| Item 1 | Age at recruitment | Continuous |
| Item 2 | Currently married with a woman | Dichotomous |
| Item 3 | Beijing *Hukou* | Dichotomous |
| Item 4 | Years of living in Beijing | Continuous |
| Item 5 | Nitrite inhalants use in the past 3 months | Dichotomous |
| Item 6 | Illegal drug use in the past 3 months | Dichotomous |
| Item 7 | Alcohol use in the past 3 months | Ordinal |
| Item 8 | Alcohol consumption before sex in the past 3 months | Ordinal |
| Item 9 | Time since the first sex | Continuous |
| Item 10 | Time since the first anal sex | Continuous |
| Item 11 | Number of lifetime male sexual partners | Continuous |
| Item 12 | Number of male sexual partners in the past 3 months | Continuous |
| Item 13 | Frequency of receptive anal sex in the past 3 months | Continuous |
| Item 14 | Proportion of condom use during receptive anal sex with male partners in the past 3 months | Continuous |
| Item 15 | Frequency of insertive anal sex in the past 3 months | Continuous |
| Item 16 | Proportion of condom use during insertive anal sex with male partners in the past 3 months | Continuous |
| Item 17 | Sex with female partners in the past 3 months | Dichotomous |
| Item 18 | Condom use during sex with female partners in the past 3 months | Ordinal |
| Item 19 | Syphilis infection | Dichotomous |

1Items 4, 12 and 14 were fitted using restricted cubic splines with 3 knots; otherwise, 4 knots were used for remaining continuous variables.
