# Supplementary material for: Risk Prediction Score for HIV Infection: Development and Internal Validation with Cross-Sectional Data from Men Who Have Sex with Men in China
Source: Springer Nature journal article supplement (doi:10.1007/s10461-018-2129-y), 2018-05-21
Supplement: MOESM3 [file 15778688]

**Appendix S3. Calculation equation for reduced-form model**

, where

| **Coefficient** | **Parameter (** |
| --- | --- |
| *-1.389129* | [*Intercept*](http://www.baidu.com/link?url=UAqwjRxIUNGF25qvH2brpBKoU2zbVve0wWFFhrTs5YiyK6pS2LcRphrDL46vGLOm3aZgkc9dJxYX31MePOiVk7_JplhYF2H9cVZBzrY2kcm) |
| *-0.5894049×X* | Beijing *Hukou* |
| *-0.06998021×X+0.0002685278×(X-1)3-0.000319676×(X-5)3+5.114816×10-5×(X-26)3* | Years of living in Beijing |
| *1.469733×X* | Illegal drug use in the past 3 months |
| 0.1197914×*X*1-0.0006558911×*X*2+0.6797062×*X*3 | Alcohol consumption before sex in the past 3 months (*X*1-occasionally, *X*2-sometimes, *X3*-often) |
| *0.08171669×X-0.0003765968×(X-1)3+0.0003965678×(X-5)3+8.049557×10-5×(X-10)3-0.0001004666×(X-25)3* | Time since the first sex |
| *0.0944042×X-0.0006300879×(X-1)3+0.0009825397×(X-5)3-0.0003516696×(X-12)3-7.821989×10-7×(X-80)3* | Number of lifetime male sexual partners |
| -0.9703724*×X+*0.1609107×*X*3-0.3222955×(*X*-1)3+0.1615034×(*X*-2)3-0.0001185397×(*X*-6)3 | Number of male sexual partners in the past 3 months |
| 0.2472914×*X*-0.01290321×*X*3+0.01505375×(*X-1)*3-0.002150535×(*X-7)*3 | Frequency of receptive anal sex in the past 3 months |
| 0.0005276872×*X*+1.480048×10-7×(*X*-5)3-1.53049×10-5×(*X*-60)3+8.21419×10-5×(*X*-90)3-6.6985×10-5×(*X*-96.66667)3 | Proportion of condom use during receptive anal sex with male partners in the past 3 months |
| -0.07848216×*X*+0.001160295×*X*3-0.001450368×(*X*-2)3 +0.0002900736×(*X*-10)3 | Frequency of insertive anal sex in the past 3 months |
| -0.6406757×*X* | Sex with female partners in the past 3 months |
| 1.061427×*X* | Current syphilis infection |

and {c} = 1 if subject is in group c, 0 otherwise; (x)+ = x if x > 0; 0 otherwise.
